# Supplementary material
Source: PubMed Central journal article supplement (PMC4165446)
Supplement: bi500703s_si_001.pdf [file bi500703s_si_001.pdf]

Supplemental Material for

# Substrate Positioning by Gln<sup>239</sup> Stimulates Turnover in FIH, an $\alpha$ KG-Dependent Hydroxylase

John A. Hangasky,<sup>1</sup> Geoffrey T. Ivison,<sup>1,2</sup> Michael J. Knapp<sup>1\*</sup>

<sup>1</sup>Department of Chemistry, University of Massachusetts, Amherst, MA, 01003

<sup>2</sup>School of Natural Science, Hampshire College, Amherst, MA, 01003

Voice: (413) 545-4001, Fax: (413) 545-4490

Email: [mknapp@chem.umass.edu](mailto:mknapp@chem.umass.edu)

1. Thermal Stability of FIH and Gln<sup>239</sup>→X Variants
2. Intrinsic Tryptophan Fluorescence

## 1. Differential Scanning Calorimetry

The thermal stability of all the Gln<sup>239</sup>→X variants was determined using a MicroCal VP-DSC Microcalorimeter. FIH (30 μM) was reconstituted with CoCl<sub>2</sub> (30 μM) and αKG (400 μM) in 50 mM HEPES pH 7.00. Samples were heated in the calorimeter over a 10-70°C range with a scan rate of 30 °C/h. Thermal unfolding of FIH was irreversible, and the apparent melting temperature ( $T_{M(\text{app})}$ ) was taken as the peak in the heat capacity data. To correct for baseline drift, a buffer scan was subtracted from each data set.

**Table S1** Melting temperatures determined using DSC for Gln<sup>239</sup>→X variants

|                     | $T_{M(\text{app})}$<br>(°C) |
|---------------------|-----------------------------|
| WT FIH <sup>a</sup> | 54.5                        |
| Q239A               | 54.3                        |
| Q239N <sup>a</sup>  | 56.2                        |
| Q239H               | 53.2                        |
| Q239E               | 51.9                        |
| Q239L               | 53.3                        |

FIH (30μM) in 50 mM HEPES pH 7.00

- a. Saban, E., Chen, Y.-H., Hangasky, J., Taabazuing, C., Holmes, B., and Knapp, M. (2011) The second coordination sphere of FIH controls hydroxylation, *Biochemistry* 50, 4733-4740.

## 2. Intrinsic Tryptophan Fluorescence

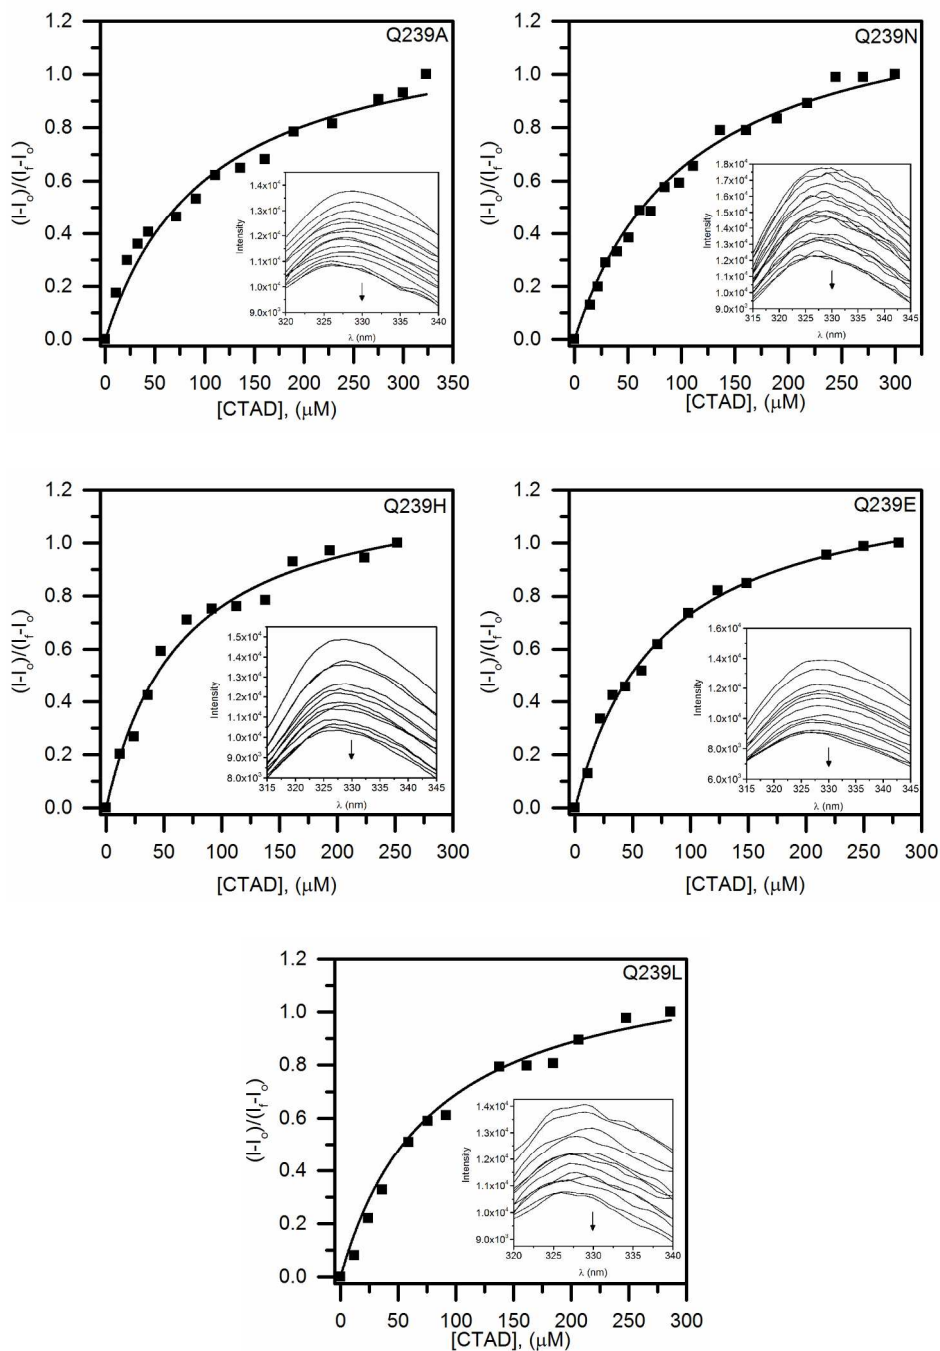

**Figure S1 Intrinsic tryptophan fluorescence.** Normalized fluorescence intensity at 330 nm versus total [CTAD]. FIH (1.5  $\mu\text{M}$ ),  $\text{CoCl}_2$  (25  $\mu\text{M}$ ) and  $\alpha\text{KG}$  (500  $\mu\text{M}$ ) in 50 mM HEPES pH 7.05 was titrated with a CTAD stock (1.00 mM) containing FIH (1.5  $\mu\text{M}$ ),  $\text{CoCl}_2$  (25  $\mu\text{M}$ ) and  $\alpha\text{KG}$  (500  $\mu\text{M}$ ) in 50 mM HEPES pH 7.05. Inset: Fluorescence emission spectra collected after each addition of CTAD.
